# Supplementary material
Source: ML conference proceedings conference paper supplement (https://proceedings.neurips.cc/paper_files/paper/2016/hash/4b0250793549726d5c1ea3906726ebfe-Abstract.html)
Supplement: Supplementary file [file 4b0250793549726d5c1ea3906726ebfe-Supplemental.zip]

---

# Can Peripheral Representations Improve Clutter Metrics on Complex Scenes?

---

**Arturo Deza**

Dynamical Neuroscience  
Institute for Collaborative Biotechnologies  
UC Santa Barbara, CA, USA  
deza@dyns.ucsb.edu

**Miguel P. Eckstein**

Psychological and Brain Sciences  
Institute for Collaborative Biotechnologies  
UC Santa Barbara, CA, USA  
eckstein@psych.ucsb.edu

## Supplementary Material

### Beyond Foveated Feature Congestion

We extended other clutter models to their respective peripheral versions. Since the other models: Edge Density, Subband Entropy and ProtoObject Segmentation have not been designed to produce an intermediate step with a dense clutter pixel-wise representation (unlike Feature Congestion), it is hard to find respective optimal dense clutter representations without losing the essence of each model. For Edge Density, we compute the magnitude of the image gradient after grayscale conversion. For Subband Entropy, we decided to keep all the respective subbands, as the model proposes as well as the coefficients that are used to compute a weighted sum over the entropies. In other words, our dense version of Subband Entropy is more of a dense “Subband Energy” term, since computing Entropy over a vector of a small  $N \times K$  vector space of  $N = 3$  scales and  $K = 4$  orientations produced very little room for variation. Finally dense ProtoObject Segmentation was computed by following the intuition of final number of superpixels over initial number of superpixels, but since this is not applicable at a pixel wise level, we decided to compute multiple ProtoObject Segmentations with different regularizer and superpixel radius parameters, and averaged all superpixel segmentation ratios – where every map was dense at a superpixel level, and each superpixel score was the initial number of pixels over the final number of initial number of pixels that belong to that superpixel after the meanshift merging stage in HSV color space.

| Foveated Feature Congestion vs Hit Rate correlation       |                                    |                                    |                                    |                  |                  |
|-----------------------------------------------------------|------------------------------------|------------------------------------|------------------------------------|------------------|------------------|
| Distance                                                  | 4 deg                              | 6 deg                              | 8 deg                              | 10 deg           | 12 deg           |
| L1-norm                                                   | $-0.80 \pm 0.04$                   | <b><math>-0.82 \pm 0.04</math></b> | $-0.81 \pm 0.05$                   | $-0.79 \pm 0.05$ | $-0.76 \pm 0.06$ |
| L2-norm                                                   | <b><math>-0.79 \pm 0.05</math></b> | <b><math>-0.79 \pm 0.06</math></b> | $-0.77 \pm 0.06$                   | $-0.75 \pm 0.07$ | $-0.71 \pm 0.07$ |
| KL-divergence                                             | $-0.80 \pm 0.04$                   | <b><math>-0.82 \pm 0.04</math></b> | <b><math>-0.82 \pm 0.04</math></b> | $-0.81 \pm 0.05$ | $-0.77 \pm 0.06$ |
| Foveated Edge Density vs Hit Rate correlation             |                                    |                                    |                                    |                  |                  |
| Distance                                                  | 4 deg                              | 6 deg                              | 8 deg                              | 10 deg           | 12 deg           |
| L1-norm                                                   | <b><math>-0.76 \pm 0.06</math></b> | $-0.73 \pm 0.07$                   | $-0.69 \pm 0.08$                   | $-0.65 \pm 0.09$ | $-0.59 \pm 0.09$ |
| L2-norm                                                   | <b><math>-0.72 \pm 0.07</math></b> | $-0.66 \pm 0.08$                   | $-0.62 \pm 0.09$                   | $-0.56 \pm 0.10$ | $-0.50 \pm 0.11$ |
| KL-divergence                                             | <b><math>-0.76 \pm 0.06</math></b> | <b><math>-0.76 \pm 0.06</math></b> | $-0.73 \pm 0.07$                   | $-0.69 \pm 0.08$ | $-0.63 \pm 0.08$ |
| Foveated Subband Entropy vs Hit Rate correlation          |                                    |                                    |                                    |                  |                  |
| Distance                                                  | 4 deg                              | 6 deg                              | 8 deg                              | 10 deg           | 12 deg           |
| L1-norm                                                   | $-0.75 \pm 0.04$                   | <b><math>-0.77 \pm 0.04</math></b> | <b><math>-0.77 \pm 0.05</math></b> | $-0.76 \pm 0.05$ | $-0.73 \pm 0.06$ |
| L2-norm                                                   | $-0.74 \pm 0.05$                   | <b><math>-0.76 \pm 0.05</math></b> | <b><math>-0.76 \pm 0.05</math></b> | $-0.75 \pm 0.06$ | $-0.71 \pm 0.06$ |
| KL-divergence                                             | $-0.79 \pm 0.04$                   | $-0.83 \pm 0.04$                   | <b><math>-0.84 \pm 0.04</math></b> | $-0.83 \pm 0.04$ | $-0.80 \pm 0.05$ |
| Foveated ProtoObject Segmentation vs Hit Rate correlation |                                    |                                    |                                    |                  |                  |
| Distance                                                  | 4 deg                              | 6 deg                              | 8 deg                              | 10 deg           | 12 deg           |
| L1-norm                                                   | $-0.70 \pm 0.06$                   | <b><math>-0.74 \pm 0.06</math></b> | <b><math>-0.74 \pm 0.06</math></b> | $-0.72 \pm 0.06$ | $-0.66 \pm 0.07$ |
| L2-norm                                                   | $-0.74 \pm 0.04$                   | <b><math>-0.76 \pm 0.05</math></b> | <b><math>-0.76 \pm 0.05</math></b> | $-0.76 \pm 0.06$ | $-0.72 \pm 0.06$ |
| KL-divergence                                             | $-0.66 \pm 0.06$                   | <b><math>-0.71 \pm 0.05</math></b> | $-0.68 \pm 0.06$                   | $-0.61 \pm 0.07$ | $-0.54 \pm 0.08$ |

Table 1: Foveated Clutter Models distance and ROI window length (deg) search.

## PIFC maps

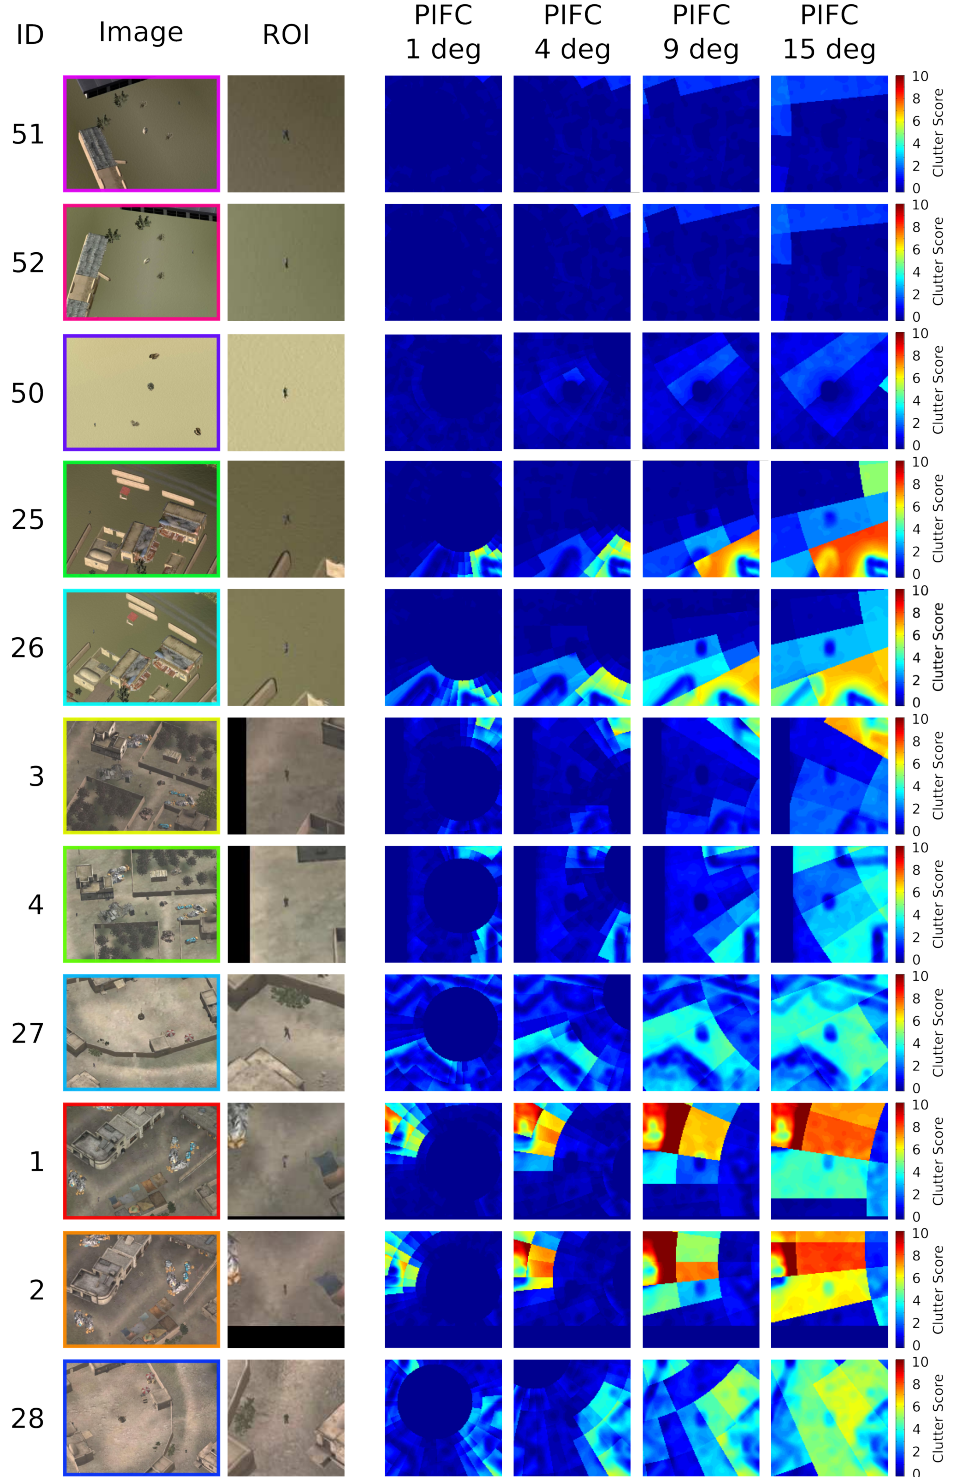

Figure 1: PIFC maps across the images used for our analysis ranked from least (top) to highest (bottom) FFC clutter as shown in Fig.6. Notice how the clutter scores (heatmap values) in the PIFC increase as a function of eccentricity and is contingent on the amount of clutter in the ROI.
